# Supplementary material for: Mistreatment of women in public health facilities of Ethiopia
Source: Springer Nature journal article supplement (doi:10.1186/s12978-019-0781-y), 2019-08-27
Supplement: MOESM1 [file 17107334]

**MCSP ETHIOPIA- MEASURING RESPECTFUL MATERNITY CARE (RMC)  
AMONG POSTPARTUM AND CHILD IMMUNIZATION CLIENTS**

መለያ ID: [ ][ ] [ ][ ] [ ][ ] [ ][ ] [ ][ ]

Tool A የተገልጋዮች ቃለ-መጠይቅ ማድረጊያ መጠይቅ/ Client Interview Questionnaire

|                                  |                                                                                                                      |                                                    |                                                                                 |
|----------------------------------|----------------------------------------------------------------------------------------------------------------------|----------------------------------------------------|---------------------------------------------------------------------------------|
| Region                           | ትግራይ/ Tigray [ 0 ] [ 1 ]<br>አሮሚያ/Oromiya [ 0 ] [ 4 ]                                                                 | አማራ/Amhara [ 0 ] [ 3 ]<br>ደብ-ብህክ/SNNPR [ 0 ] [ 7 ] | [ ][ ]                                                                          |
| Facility name:                   | _____                                                                                                                |                                                    | የጤና ተቋሙ በጥናቱ የተሰጠው ኮድ<br>Fac. Code for Study: (see fac. Code attached)<br>_____ |
| የጤና ተቋሙ ዓይነት/Facility type       | 01-ሪፈራል ሆስፒታል/ Referral Hospital<br>02-የመጀመሪያ ደረጃ ሆስፒታል/Primary Hospital<br>03-ጤና ጣቢያ/Health Centre                  |                                                    | [ ][ ]                                                                          |
| የቃለ-መጠይቅ ውጤቶች/Interview Outcomes | 01 ተጠናቋል/Complete<br>02 በከፊል ተጠናቋል/ Partially completed<br>03 አንቢተኛ/ Refused<br>88=ሌላ (ይጥቀሱ)<br>Other(Specify) _____ |                                                    | [ ][ ]                                                                          |
| ተቆጣጣሪ SUPERVISOR                 |                                                                                                                      | ቃለ-መጠይቅ አድራጊ INTERVIEWER                           |                                                                                 |
| Name                             | _____                                                                                                                |                                                    |                                                                                 |
| DATE (DD/MM/YY)                  | _____                                                                                                                |                                                    |                                                                                 |

ቃለ-መጠይቅ የተደረገበት ሰአት:- TIME INTERVIEW STARTED: [ ][ ] : [ ][ ]

የአገልግሎት/የተገልጋዩ ዓይነት የድህረ-ወሊድ ህክምና Service/Client type:

- \_\_\_\_\_ a) የድህረ-ወሊድ ህክምና Postpartum/Postnatal Clinic
- \_\_\_\_\_ b) የክትባቱ እና የጨቅላ ህጻናት ህክምና/Immunization (Child) Clinic
- \_\_\_\_\_ c) የቤተሰብ ምጣኔ እና ድህረ ወሊድ ህክምና/ Family Planning Clinic – Postpartum Client

|    |                                                                                                                      |                               |
|----|----------------------------------------------------------------------------------------------------------------------|-------------------------------|
| A. | የሰነ-ህዝብ መረጃ Demographics                                                                                             |                               |
|    | ስለእርስዎ እና ስለ ጤናዎ አንዳንድ ጥያቄ አጠይቅዎታለሁ::<br>Now, I would like to ask you some questions about yourself and your health. |                               |
|    | አብዛኛውን ጊዜ የት ነው የሚኖሩት? Where do you usually live?                                                                    | 1)ከተማ/ urban<br>2)ገጠር/rural   |
|    | እድሜዎ ስንት ነው? How old are you?                                                                                        | _____ ዓመት years (NUMERIC 15+) |
|    | ት/ቤት ገብተው ያውቃሉ? Have you ever attended school?                                                                       | 1 አዎ Yes<br>0 የለም No → GOTO 5 |

**MCSP ETHIOPIA- MEASURING RESPECTFUL MATERNITY CARE (RMC)  
AMONG POSTPARTUM AND CHILD IMMUNIZATION CLIENTS**

|          |                                                                                                                                                                                                          |                                                                                                                                                                           |
|----------|----------------------------------------------------------------------------------------------------------------------------------------------------------------------------------------------------------|---------------------------------------------------------------------------------------------------------------------------------------------------------------------------|
|          | ከፍተኛ የደረሰብት የትምህርት ደረጃ ስንት ክፍል ነው?<br>What is the highest level of school you attended?                                                                                                                  | In formal education/can read and write<br>Primary<br>Secondary<br>TVET/College/University                                                                                 |
|          | የምትከሉት ኃይማኖት ምንድን ነው?<br>What is your religion?                                                                                                                                                          | 1 ሙስሊም Muslim<br>2 ኦርቶዶክስ ክርስቲያን Orthodox Christian<br>3 ሌላ ክርስቲያን፣ (ፕሮቴስታንት፣ ካቶሊክ ወዘተ) Other Christian (protestant, catholic etc)<br>96 ሌሎች (ይግለጹ) Other (specify) _____ |
|          | የጋብቻ ሁኔታዎ?<br>What is your marital status?                                                                                                                                                               | 1 ያላገቡ Never married / Single<br>2 ጋብቻ የመሰረቱ ወይም ከትዳር ጋር አብረው የሚኖሩ Currently married or co-habiting<br>3 የተለያዩ/ተፋቱ Separated/ Divorced<br>4 የትዳር አጋር የሞተባቸው Widowed       |
|          | የሥራ ሁኔታዎ?<br>What is your employment status?                                                                                                                                                             | ሥራ የማትሰሩ/የቤት እመቤት Not employed /house wife<br>ሠራተኛ (የግል ሥራ/በሌላ አካላት ተቀጥረው የሚሰሩ) Employed (self-employed/employed by other entity)<br>ተማሪ Student                          |
|          | በህይወት ዘመንዎ የአሁኑን ጨምሮ ስንት ጊዜ ወልደዋል?<br>Over the course of your life, how many births have you had including this one?                                                                                     | _____ (NUMERIC (if 1 GOTO 10))                                                                                                                                            |
|          | ስንት ሴት ልጆች አሉዎት?<br>How many girl children do you have?<br>ስንት ወንድ ልጆች አሉዎት?<br>How many boy children do you have?                                                                                       | _____ ሴቶች girls<br>_____ ወንዶች boys                                                                                                                                        |
|          | ባለፉት 12 ወራት ውስጥ ለልጆችዎ ወይም ለራስዎ በተለያዩ ምክንያት ስንት ጊዜ ወደ የህክምና ማዕከል ሄደሻል?<br>In the last 12 months, how many times have you been to a health care facility for your children or for yourself for any reason? | _____ NUMERIC                                                                                                                                                             |
|          | አሁን ለመጨረሻ ጊዜ ለነበርዎት ጽንሰ ስንት ጊዜ የቅድመ ወሊድ አገልግሎት ከትትል በድምሩ አግኝተዋል?<br>How many antenatal (ANC) care visits did you make in total for your most recent pregnancy at health facility?                        | _____ (numeric)                                                                                                                                                           |
| <b>B</b> | <b>Delivery Characteristics</b>                                                                                                                                                                          |                                                                                                                                                                           |
|          | በመቀጠል አሁን ለመጨረሻ ጊዜ የነበርዎት የወሊድ አገልግሎት አንዳንድ ጥያቄ አነሳልዎታለሁ፡፡<br>Now I'm going to ask you some questions about your recent delivery                                                                         |                                                                                                                                                                           |
| 12       | መቶ ወለዱ? When did you give birth?                                                                                                                                                                         | a). ከ ___ ቀናት በፊት days ago OR<br>b). ከ ___ ሳምንታት በፊት weeks ago                                                                                                            |
| 12A      | በምን ጊዜ ወለዱ? What time did you give birth                                                                                                                                                                 | 1 ቀን Day time<br>0 ማታ Night time                                                                                                                                          |

**MCSP ETHIOPIA- MEASURING RESPECTFUL MATERNITY CARE (RMC)  
AMONG POSTPARTUM AND CHILD IMMUNIZATION CLIENTS**

|     |                                                                                                                                                                                                                 |                                                                                                                                                                                                                                                                                                                                    |
|-----|-----------------------------------------------------------------------------------------------------------------------------------------------------------------------------------------------------------------|------------------------------------------------------------------------------------------------------------------------------------------------------------------------------------------------------------------------------------------------------------------------------------------------------------------------------------|
| 13  | በወሊድ ወይም በምጥ ወቅት ሌሎች ወገኖች በእርስዎ ምርጫ አብረዎት እንዲሆኑ ተፈቅዶሎታል?<br>Were you allowed to have the companion of your choice stay with you during labor?                                                                   | 1 አዎ Yes<br>0 የለም No                                                                                                                                                                                                                                                                                                               |
| 13A | በምጥ ወቅት ወይም በወሊድ ወቅት አገልግሎት ባገኙበት ቦታ ከእርስዎ ጋር የነበሩት ድጋፍ ሰጪ ሰዎች ከጎንዎት ነበሩ? Were you allowed to have the companion of your choice stay with you during child birth?                                               | 1 አዎ Yes<br>0 የለም No                                                                                                                                                                                                                                                                                                               |
| 14  | በምጥ ወቅት ወይም በወሊድ ወቅት አገልግሎት ባገኙበት ቦታ ከእርስዎ ጋር የነበሩት ድጋፍ ሰጪ ሰዎች ከጎንዎት ነበሩ?<br>Did the companion stay with you during most of your labor, at your side?                                                           | 1 አዎ Yes<br>0 የለም No                                                                                                                                                                                                                                                                                                               |
| 15  | ምጥ በያዝዎት ወቅት አብርዎት የነበረው ማን ነው?<br>WHO was with you during labor?<br><br>የነበረው ሁሉ ላይ ምልክት ያድርጉ<br>CHECK ALL THAT APPLY                                                                                          | 1. እናት Mother<br>2. ባል Husband<br>3. ሌላ የቤተሰብ አካል (የባል እናት፣ አባት፣ የባል አባት፣ እህት፣ የባል እህት፣ ሴት ልጅ፣ ወንድ ልጅ ወዘተ)<br>Other family members (Mother-in-law, Father, father-in-law, sister, sister-in-law, daughter, son etc)<br>4. ዘመድ ወይም ጓደኛ Relatives or Friends<br>5. የጤና ኤክስፐርት ለሌሎች ወይም የማህበረሰብ በጎ ፈቃደኞች HEWs or community volunteers |
| 16  | ሰውየው ሴት ወይም ወንድ ነው? Was the person male or female                                                                                                                                                               | ወንድ Male<br>ሴትFemale<br>ሁለቱም ተፈቅዶላቸዋል Both were allowed                                                                                                                                                                                                                                                                            |
| 17  | በወሊድ ጊዜ አብርዎት ማን ነበር?<br>WHO was with you during childbirth?<br>የነበረው ሁሉ ላይ ምልክት ያድርጉ::<br>CHECK ALL THAT APPLY                                                                                                 | 1. እናት Mother<br>2. ባል Husband<br>3. ሌላ የቤተሰብ አካል (የባል እናት፣ አባት፣ የባል አባት፣ እህት፣ የባል እህት፣ ሴት ልጅ፣ ወንድ ልጅ ወዘተ) Other family members (Mother-in-law, Father, father-in-law, sister, sister-in-law, daughter, son etc)<br>4. ዘመድ ወይም ጓደኛ Relatives or Friends<br>5. የጤና ኤክስፐርት ለሌሎች ወይም የማህበረሰብ በጎ ፈቃደኞች HEWs or community volunteers    |
| 18  | በዚህ ወሊድ ዙሪያ ከዚያ በፊትም ሆነ በዚያን ወቅት ወይም ከዚያ በኋላ ወደዚህ ጤና ተቋም የመጡት ከሌላ ጤና ተቋም ሪፈር ተደርገው ነው?<br>Were you sent/referred from another facility to this facility at any point before, during, or after current delivery? | 0 የለም ወደዚህ ጤና ተቋም የመጣሁት በቀጥታ ነው::<br>No, I Came directly to this facility<br>1 በጤና ኤክስፐርት ለሌሎች ተልኬ ነው የመጣሁት<br>Sent from HEW<br>2 ከጤና ጣቢያ ተልኬ ነው የመጣሁት Sent from health center to this facility<br>3 ከሆስፒታል ተልኬ ነው የመጣሁት Sent from hospital to this facility                                                                       |



**MCSP ETHIOPIA- MEASURING RESPECTFUL MATERNITY CARE (RMC)  
AMONG POSTPARTUM AND CHILD IMMUNIZATION CLIENTS**

| C. | Perceived Quality and Satisfaction                                                                                                                                                                                                                                                                                                             |                                                                                      |
|----|------------------------------------------------------------------------------------------------------------------------------------------------------------------------------------------------------------------------------------------------------------------------------------------------------------------------------------------------|--------------------------------------------------------------------------------------|
| 22 | <b>አቀባበል:-</b> በጽንሰ እና ወሊድ አገልግሎት ወደ ጤና ተቋም በመጡ ጊዜ የጤና ተቋም ሠራተኛ ሰጥቶ ተቀብሎታል? Reception: Did the health worker receive and greet you when you came to this facility during L&D?                                                                                                                                                                  | 1 አዎ Yes<br>0 የለም No                                                                 |
| 23 | <b>በአቀባበል/ምርመራ ወቅት የተደረገ ማብራሪያ:-</b> በጤና ተቋም የጽንሰ እና የወሊድ ህክምና አገልግሎት ለማግኘት በመጡ ጊዜ የምርመራውን እያንዳንዱን ደረጃ የጤና ባለሙያው በግልጽ አብራርቶታል?<br><b>Explanation during admission/ examination:</b> During your L&D in this facility did the health workers explain each step of the examination to you?                                                       | 1 አዎ Yes<br>0 የለም No                                                                 |
| 24 | <b>በምጥ እና ወሊድ ወቅት የተደረገ ማብራሪያ:-</b> በጤና ተቋም የጽንሰ እና የወሊድ አገልግሎት ለማግኘት በመጡ ጊዜ በምጥ ወቅት ምን ሊከስትልዎት እንደሚችል የጤና ባለሙያው አብራርቶታል?<br><b>Explanation during labor:</b> During your L&D in this facility did the health workers explain what will happen in labour to you?                                                                               | 1 አዎ Yes<br>0 የለም No                                                                 |
| 25 | <b>የጥያቄዎች ምላሽ:-</b> በጤና ተቋም የጽንሰ እና የወሊድ አገልግሎት ለማግኘት በመጡ ጊዜ የተቋሙ የጤና ባለሙያ ለጥያቄዎች ምላሽ በትኩረት ሰጥቶታል?<br><b>Responding to questions:</b> During your L&D in this facility did the health workers respond to your questions politely?                                                                                                              | 1 አዎ Yes<br>0 የለም No<br>9 እናቶች አልጠየቁም NA (women did not ask )                        |
| 26 | <b>እንቅስቃሴ:-</b> በጤና ተቋም የጽንሰ እና የወሊድ አገልግሎት ለማግኘት በመጡ ጊዜ የተቋሙ ሠራተኛ በእግር እንዲራመዱ እና የአተኛነት አቅጣጫ መለዋወጥ እንዲችሉ የበኩሉን አስተዋጽኦ አድርጓል?<br><b>Movement:</b> During your L&D in this facility did the health workers encourage you to walk and change positions                                                                                           | 1 አዎ Yes<br>0 የለም No                                                                 |
| 27 | <b>የወሊድ አተኛነት አቅጣጫ:-</b> በጤና ተቋም የጽንሰ እና የወሊድ አገልግሎት ለማግኘት በመጡ ጊዜ የተቋሙ አዋላጅ በወለዱ ጊዜ እርስዎ በፈለጉት የወሊድ አቅጣጫ አዋልድዎታል?<br><b>Position:</b> During your L&D in this facility did the health workers allowed you to give birth in the position you want                                                                                               | 1 አዎ Yes<br>0 የለም No                                                                 |
| 28 | <b>ምግብ:-</b> ከወሊድ በኋላ ትኩስ መጠጥ ወይም ምግብ ተሰጥቶታል? FOOD: After delivery, were you offered any hot drink or food?                                                                                                                                                                                                                                    | 1 አዎ Yes<br>0 የለም No                                                                 |
| 29 | <b>እንክብካቤ:-</b> በወሊድ ወቅት የተቋሙ ጤና ባለሙያዎች ያሳዩትን የእንክብካቤ እና ትኩረት ደረጃ ምን ደረጃ ያወጡለታል?<br><b>Caring:</b> How would you rate the caring and empathy (compassion) of the health workers at this facility for this delivery?                                                                                                                            | 1 እጅግ በጣም ጥሩ Excellent<br>2 በጣም ጥሩ Very good<br>3 ጥሩ Good<br>4 በቂ Fair<br>5 ደካማ Poor |
| 30 | <b>አክብሮት:-</b> በጤና ተቋም በዚህ ወሊድ ወቅት የጤና ተቋም ህክምና ባለሙያ ያሳዩትን አክብሮት ምን ደረጃ ያወጡለታል? አክብሮት ማለቴ የጤና ባለሙያው የሰጥዎት እንክብካቤ እና እርስዎ በሚሰጡት መልክ በአክብሮት መንከባከቡን ነው::<br><b>Respect:</b> How would you rate the respect the providers showed you at this facility for this delivery? By respect I mean being treated with the care and attention you deserve. | 1 እጅግ በጣም ጥሩ Excellent<br>2 በጣም ጥሩ Very good<br>3 ጥሩ Good<br>4 በቂ Fair<br>5 ደካማ Poor |
| 31 | <b>በአጠቃላይ ሁሉንም ነገር ግምት ውስጥ በማስገባት በጤና ተቋም በዚህ ወሊድ ወቅት ያገኙትን እንክብካቤ ጥራት ምን ደረጃ ይሰጡታል?</b><br>Overall, taking everything into account, how would you rate the quality of care you received at this facility for this delivery?                                                                                                                   | 1 እጅግ በጣም ጥሩ Excellent<br>2 በጣም ጥሩ Very good<br>3 ጥሩ Good<br>4 በቂ Fair               |

**MCSP ETHIOPIA- MEASURING RESPECTFUL MATERNITY CARE (RMC)  
AMONG POSTPARTUM AND CHILD IMMUNIZATION CLIENTS**

|    |                                                                                                                                                                                                                                                                                                                                                                                                                                                                                                                                                                                                                    |                                                                                                                                                                                                                                   |
|----|--------------------------------------------------------------------------------------------------------------------------------------------------------------------------------------------------------------------------------------------------------------------------------------------------------------------------------------------------------------------------------------------------------------------------------------------------------------------------------------------------------------------------------------------------------------------------------------------------------------------|-----------------------------------------------------------------------------------------------------------------------------------------------------------------------------------------------------------------------------------|
|    |                                                                                                                                                                                                                                                                                                                                                                                                                                                                                                                                                                                                                    | 5 ደካማ Poor                                                                                                                                                                                                                        |
| 32 | በአጠቃላይ በጤና ተቋሙ የተሰጥዎት አገልግሎት ምን ያህል አርክትዎታል?<br>Overall, how satisfied are you with the way health care services are provided in this facility?                                                                                                                                                                                                                                                                                                                                                                                                                                                                    | 1 በጣም ረክቻለሁ<br>Very satisfied<br>2 የተወሰነ ረክቻለሁ<br>Somewhat Satisfied<br>3 አልረካውምም ረክቻለውምም አልልም<br>Neither satisfied nor dissatisfied/neutral<br>4 የተወሰነ አልረካውም<br>Somewhat dissatisfied<br>5 በጣም አልረካውም<br>Very dissatisfied      |
| D  | <b>የክብር እና የእንክብካቤ ማጣት ገጠመኞች Experience of Disrespect and Abuse</b>                                                                                                                                                                                                                                                                                                                                                                                                                                                                                                                                                |                                                                                                                                                                                                                                   |
|    | አሁን ስላለዎት ልምድ አጠይቅዎታለሁ። ለጥያቄዎች ትክክለኛ የሆነ እና ያልሆነ የሚባል መልስ የለም። የሚሰጡን ማንኛውም መረጃ ከእርስዎ እና ከልጆችዎ ስም ጋር የማይገናኝ እና እንደዚሁም እርስዎም ሆነ የቤተሰቦችዎ አባላት አሁንም ወደፊት ከጤና ተቋሙ የሚያገኙት አገልግሎት ላይ ተጽዕኖ የማያሰከትል ነው። ለሚሰነዘርልዎት ጥያቄ ምቹት ካልተሰማዎች ምላሽ አለመስጠት ወይም ማለፍ ይችላሉ። Now I will ask about your experience. There is no right or wrong answers to these questions. Nothing you tell us will be linked to your name, your children’s names, or the ability of you or your family members to access health care in the future. You can skip any question you are not comfortable answering, and you can stop the interview at any point. |                                                                                                                                                                                                                                   |
| 33 | አሁን መጨረሻ ላይ በነበርዎት የወሊድ ጊዜ ከደረጃ 1-5 ባለው ልኬት መሠረት የእርስዎን ስብህና በሚጋፋ መልኩ ምቹትዎን የሚነሳ ግልጋሎት አግኝተዋል?<br>In your recent delivery, on a scale of 1 to 5, were you treated in a way that made you feel humiliated or disrespected?<br><br>ከ1-3 ያለውን ምላሽ ተመልክተው ተገቢውን መልስ ይስጡበት<br>[READ RESPONSE CATEGORIES 1 TO 3]                                                                                                                                                                                                                                                                                                         | 1. ክብራ ተነክቷል<br>Humiliated/disrespected<br>2. የተወሰነ ክብራ ተነክቷል<br>Somewhat humiliated/disrespected<br>3. በፍጹም ክብራ አልተነካም<br>Not humiliated or disrespected at all                                                                  |
| 34 | <b>በፈቃደኝነት ላይ ያልተመሰረተ የህክምና አሰጣጥ:-</b> በዚህ ወሊድ ሳቢያ በጤና ተቋም በቆዩበት ጊዜ ያለእርስዎ ይሁንታ እና ፈቃድ የተሰጥዎት የህክምና አገልግሎት አለ?<br>Non-consented care: At any point during your stay for this delivery was any treatment done to you without your permission?                                                                                                                                                                                                                                                                                                                                                                       | 1 አዎ Yes<br>0 የለም - No → GOTO 36                                                                                                                                                                                                  |
| 35 | <b>በፈቃደኝነት ላይ ያልተመሰረተ የህክምና አሰጣጥ:-</b> ያለእርስዎ ፈቃድ የተደረገብዎት የህክምና ሂደቶች አሉ?<br><b>Non-consented care:</b> What procedures were done without your permission?<br>(አያንቡት፣ የሚመለከትዎት ሁሉም ላይ ያክቡ ሌላም ካለ ይጥቀሱ) (DO NOT READ, Circle all that apply, prompt for any more)                                                                                                                                                                                                                                                                                                                                                   | 1 የቱቦ መክተት Tubal ligation<br>2 የማህጸን ቀዶ ጥገና Hysterectomy<br>3 የሆድ መዳሰስ ህክምና<br>Abdominal palpation<br>4 የብልት ምርመራ<br>Vaginal examination<br>5 እስተኝት Episiotomy<br>6 ጨቅላ ህጻን ከእናት መለየት<br>Newborn removed /separated<br>7 ሌላ Other |
| 36 | <b>ሚስጥራዊ ያልሆነ የህክምና አገልግሎት:-</b> በህክምና አሰጣጡ ላይ ስለነበርዎት ግላዊነት አጠይቅዎታለሁ። ግላዊነት ማለት ከቤተሰብ አባላት ውጪ የሆኑ ግለሰቦች እርስዎ እንዲታይባት ወይም እንዲሰማባት የማይፈልጉትን ነገር ሌላ ወገን ተደራሽነት እንዳይኖረው መሆን ማለት ነው። በዚህ ወሊድ ወቅት በጤና ተቋሙ በቆዩበት ጊዜ ግላዊነቱን የሚጋፋ                                                                                                                                                                                                                                                                                                                                                                                          | 1 አዎ Yes<br>2 የለም No → GOTO 38                                                                                                                                                                                                    |

**MCSP ETHIOPIA- MEASURING RESPECTFUL MATERNITY CARE (RMC)  
AMONG POSTPARTUM AND CHILD IMMUNIZATION CLIENTS**

|    |                                                                                                                                                                                                                                                                                                                                                               |                                                                                                                                                                                                                                                                                                                                                                                                                                                                                                                                                                                                         |
|----|---------------------------------------------------------------------------------------------------------------------------------------------------------------------------------------------------------------------------------------------------------------------------------------------------------------------------------------------------------------|---------------------------------------------------------------------------------------------------------------------------------------------------------------------------------------------------------------------------------------------------------------------------------------------------------------------------------------------------------------------------------------------------------------------------------------------------------------------------------------------------------------------------------------------------------------------------------------------------------|
|    | <p>ክስተት ነበር?<br/><b>Non-confidential care:</b> Now I'd like to ask you about the privacy you had. Privacy relates to keeping out of view or hearing distance of others (non-family members) things that are normally not viewed or heard by others. At any point during your stay for this delivery were you treated in a way that violated your privacy?</p> |                                                                                                                                                                                                                                                                                                                                                                                                                                                                                                                                                                                                         |
| 37 | <p><b>ሚስጥራዊ ያልሆነ የህክምና አገልግሎት:-</b> በትክክል የሆነው ምንድን ነው? (አያንቡት፣ የሚመለከትዎት ሁሉም ላይ ያክቡ ሌላም ካለ ይጥቀሱ)<br/><b>Non-confidential care:</b> What exactly happened? (DO NOT READ, Circle all that apply, prompt for any more)</p>                                                                                                                                       | <p>1 በወሊድ ወይም ምርመራ ወቅት ያላገባብሰልብሰሰ ተገለጧል፤<br/>Uncovered during delivery or examination<br/>2 በወሊድ ወይም ምርመራ ወቅት መሸፈኛ ወይም መጋረጃ አልተጠቀሙም፤<br/>No screens blocking view during delivery or examination<br/>3. የኤችአይቪ ሁኔታ የጤና ባለሙያ ላልሆነ ሰነድ ወገን ይፋ ተደርጓል፤<br/>HIV status shown to others or discussed with non-health staff<br/>4. ሌላ የጤና መረጃዎ ለሰነድ ወገን ወይም የጤና ባለሙያው አባል ላልሆኑት ወገኖች ይፋ ተደርጓል፤<br/>Other health information shown to others or discussed with non-health staff<br/>5. ስለእኔ ጉዳይ ሌሎች ወገኖች እየሰሙ ባለሙያው ተናግሯል፤<br/>Discussed my issues when other clients are listening<br/>6. ሌላ ካለ ይጥቀሱ Other</p> |
| 38 | <p><b>ክብርን የሚጋፋ ድርጊት:-</b> በእናቶች የወሊድ እና ጽንሰ አገልግሎት ክፍል ሳሉ የክፍሉ ሠራተኛ የእርስዎን ክብር የሚነካ ነገር ሰርተዋል ወይም ፈጽመዋል፤ ሰድብዎታል፤ ስለራስዎ መጥፎ ስሜት እንዲሰማዎት የሚያደርግ ነገር አድርጓል?<br/><b>D&amp;A:</b> During the time you were at the maternity care facility, did the staff say or do something to humiliate you, insult you, or make you feel bad about yourself?</p>               | <p>1 አዎ Yes<br/>2 የለም No → GOTO 42</p>                                                                                                                                                                                                                                                                                                                                                                                                                                                                                                                                                                  |
| 39 | <p><b>ክብርን የሚጋፋ ድርጊት:-</b> በእናቶች ህክምና ክፍል ሳሉ በምጥ ወይም በወሊድ ወቅት የክፍሉ ሠራተኛ በሚሰጥዎት የህክምና አገልግሎት ዙሪያ ችግር አለብዎት?<br/><b>D&amp;A:</b> Did you have a problem with the way the staff treated while you were at the maternity care facility for labor, birth?</p>                                                                                                      | <p>1 አዎ Yes<br/>2 የለም No</p>                                                                                                                                                                                                                                                                                                                                                                                                                                                                                                                                                                            |
| 40 | <p><b>ክብርን የሚጋፋ ድርጊት:-</b> በትክክል የሆነው ምንድን ነው?<br/>(አያንቡት፣ የሚመለከትዎት ሁሉም ላይ ያክቡ ሌላም ካለ እያሉ ይጠይቁ)<br/><b>D&amp;A:</b> What exactly happened?<br/>(DO NOT READ. CIRCLE ALL THAT APPLY.<br/>PROMPT: "Any More?")</p>                                                                                                                                              | <p>1 ጮሀውብኛል Shouted<br/>2 አመናጭቀውኛል Scolded<br/>3 የህክምና አገልግሎት እንደሚከለክለኝ አስፈራርተውኛል<br/>Threatened to withhold services</p>                                                                                                                                                                                                                                                                                                                                                                                                                                                                               |

**MCSP ETHIOPIA- MEASURING RESPECTFUL MATERNITY CARE (RMC)  
AMONG POSTPARTUM AND CHILD IMMUNIZATION CLIENTS**

|    |                                                                                                                                                                                                                                                                                                               |                                                                                                                                                                                                                                                      |
|----|---------------------------------------------------------------------------------------------------------------------------------------------------------------------------------------------------------------------------------------------------------------------------------------------------------------|------------------------------------------------------------------------------------------------------------------------------------------------------------------------------------------------------------------------------------------------------|
|    |                                                                                                                                                                                                                                                                                                               | <p>4 ወደ ቀድሞ ጥገና እናስገባላለን ብለው እስፈራረርተውኛል<br/>Threatened with going to theatre<br/>5 የሰድብ ስም በመጠቀም ጠርተውኛል<br/>Called by insulting name<br/>6 ስቀውብኛል ወይም የሹፊት ምልክት ተጠቅመዋል<br/>laughed at or scorned<br/>9 ሌላ ሌላ<br/>_____</p>                           |
| 41 | <p>ከላይ የተጠቀሱት ክብርን የሚነካ ድርጊት ፈጽመዋል የሚሉት ሠራተኛ ማነው?<br/>Which staff did the thing you mentioned above?</p>                                                                                                                                                                                                      | <p>1. የህክምና አገልግሎት የሰጠኝ ባለሙያዎች<br/>The health worker who attended me<br/><br/>2. የጽዳት ሠራተኞች<br/>Janitors<br/>3. የጥበቃ ሠራተኞች<br/>Guards<br/>4. ሌሎች ሠራተኞች<br/>Other staff (explain) _____</p>                                                           |
| 42 | <p>ክብርን የሚጋፋ ድርጊት፡- በምጥ ወይም ወሊድ ወቅት የጤና ባለሙያው የአካል ጥቃት/በጥፊ መምታት ወይም ቁንጥጫ አድርሶብዎታል? D&amp;A: During labor or delivery, were you physically hit /slapped/ pinched by the provider?</p>                                                                                                                          | <p>1 አዎ Yes<br/>2 የለም No</p>                                                                                                                                                                                                                         |
| 43 | <p>ችላ መባል፡- ለወሊድ አገልግሎት በጤና ተቋም በቆዩበት ጊዜ ብቻዎትን ተጥለው (የጤና ባለሙያ ክትትል አጥተው) የህክምና ድጋፍ ቢያስፈልግዎትም ያላገኙበት ሁኔታ አለ?<br/>(አያንቡት፣ የሚመለከትዎት ሁሉም ላይ ያክቡ ሌላም ካለ ይጥቀሱ) Abandonment/ Neglect: At any point during your stay for this delivery were you left alone (unattended) by health providers when you needed care?</p> | <p>1 አዎ Yes<br/>2 የለም No → GOTO 45</p>                                                                                                                                                                                                               |
| 44 | <p>መጣል እና ችላ መባል፡- የትኛው የምጥ ወይም የወሊድ ደረጃ ላይ እያሉ ነው የህክምና ድጋፍ እና አገልግሎት እያስፈለግዎት ያላገኙት? Abandonment/ Neglect: At which point during your stay for this delivery were you left unattended?<br/><br/>(DO NOT READ. CIRCLE ALL THAT APPLY. PROMPT: "Any More?")</p>                                               | <p>1 በምጥ ወቅት<br/>While in labor<br/>2 በወሊድ ወቅት<br/>While delivering<br/>3 የወሊድ የጎንዮሽ ጉዳት በታየበኝ ወቅት<br/>While experiencing a complication<br/>4 ከወሊድ በኋላ ከልጅ ጋር በተያያዘ<br/>After delivery<br/>Baby after delivery<br/>8 ሌላ ካለ ይጥቀሱ Other<br/>_____</p> |
| 45 | <p>ችላ መባል፡- በጤና ተቋም በቆዩበት ወቅት የህመም ማስታገሻ/ሌላ ህክምና እንዲሰጥዎት ጥያቄ አቅርበዋል?<br/>Abandonment/ Neglect: At any point during your stay did you ASK for pain relief /other medication?</p>                                                                                                                               | <p>1 አዎ Yes<br/>2 የለም No → GOTO 47</p>                                                                                                                                                                                                               |



**MCSP ETHIOPIA- MEASURING RESPECTFUL MATERNITY CARE (RMC)  
AMONG POSTPARTUM AND CHILD IMMUNIZATION CLIENTS**

|           |                                                                                                                                                                                                                 |                                                                                                                                                 |
|-----------|-----------------------------------------------------------------------------------------------------------------------------------------------------------------------------------------------------------------|-------------------------------------------------------------------------------------------------------------------------------------------------|
| 46        | ችላ መባል:- በጤና ተቋም በቆዩበት ጊዜ የህመም ማስታገሻ/ሌላ ህክምና ጠይቀው ችላ የተባሉበት ጊዜ አለ ብለው የሚገልጹት ካለ? Abandonment/ Neglect: At any point during your stay did you feel ignored regarding requests for pain relief /other medication? | 1 አዎ Yes<br>2 የለም No                                                                                                                            |
| <b>E.</b> | <b>የወደፊት ህይወት Looking Forward</b>                                                                                                                                                                               |                                                                                                                                                 |
|           | አመሰግናለሁ:: አሁን ወደፊት የጤና ተቋም ሊያደርግልዎት ስለሚገባው የህክምና አገልግሎት ያለዎትን እቅድ እጠይቅዎታለን::<br>Thank you. Now I would like to ask you about your intentions or plans to choose health care facilities in the future.           |                                                                                                                                                 |
| 47        | ተጨማሪ ልጆች መውለድ ይፈልጋሉ? Do you intend to have more children?                                                                                                                                                       | 1 አዎ Yes<br>2 የለም No →GOTO 58                                                                                                                   |
| 48        | ቀጣይ የሚወልዱትን ልጅ የት መውለድ ይፈልጋሉ? Where would you like to deliver your next child?                                                                                                                                  | 1 በተመሳሳይ ጤና ተቋም<br>Same facility<br>2 በሌላ ጤና ተቋም<br>Another facility<br>3 በመኖሪያ ቤት<br>Your Home<br>9 ሌላOther (specify) _____                    |
| 49        | በቀጣይ ጊዜ በምጥ ወይም በወሊድ ወቅት ድጋፍ የሚሰጥዎት ሌላ አጃቢ እንዲኖርዎት እፈልጋለሁ? Next time, would you like anyone to be with you during labor and delivery, for support?                                                              | 1 አዎ Yes<br>2 የለም No →GOTO 51                                                                                                                   |
| 50.       | በቀጣይ ጊዜ በየትኛው መገኛ ወሊድ መስጠት ይፈልጋሉ?<br>Next time, at what location would you like to give birth?                                                                                                                  | 1 በተመሳሳይ ጤና ተቋም<br>Same facility<br>2 በሌላ ጤና ተቋም<br>Another facility<br>3 በመኖሪያ ቤት<br>Your Home<br>9 ሌላOther (specify) _____                    |
| 51        | ሌሎች እናቶች በዚህ ተቋም መጥተው እንዲወልዱ ምን ዓይነት ምክረ ሀሳብ ይሰጣሉ?<br>How likely are you to recommend this facility to other women for delivery?                                                                                | 1 ከፍተኛ እድል<br>Very likely<br>2 የተወሰነ እድል አለወ.<br>Somewhat likely<br>3 እድል ያለወ. አይመስለኝም<br>Somewhat unlikely<br>4 ምንም እድል የለውም Not at all likely |
| 52        | ወደፊት ቢያረግዙ በዚህ ጤና ተቋም የሚወልዱበት እድል ምን ይመስላል?<br>How likely are you to deliver in this facility again, if you were to become pregnant in the future?                                                              | 1 ከፍተኛ እድል<br>Very likely<br>2 የተወሰነ እድል አለወ.<br>Somewhat likely<br>3 እድል ያለወ. አይመስለኝም<br>Somewhat unlikely<br>4 ምንም እድል የለውም Not at all likely |

አመሰግናለሁ::THANK YOU

የቃለ-መጠይቁ ያበቃበት ጊዜ:- TIME INTERVIEW END: [RECORD TIME IN 24-HOUR

[\_\_|\_\_ : \_\_|\_\_]
