# Supplementary material for: Mistreatment of women in public health facilities of Ethiopia
Source: Springer Nature journal article supplement (doi:10.1186/s12978-019-0781-y), 2019-08-27
Supplement: MOESM2 [file 17107334]

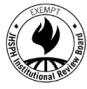

## MCSP ETHIOPIA- MEASURING RESPECTFUL MATERNITY CARE (RMC) AMONG POSTPARTUM AND CHILD IMMUNIZATION CLIENTS

### TOOL E: RMC RELATED POLICY AND PRACTICE ASSESSMENT TOOL

Name of HF \_\_\_\_\_ HF ID \_\_\_\_\_

Facility type: \_\_\_\_\_ 1. Health centre 2. Hospital

Region \_\_\_\_\_ Zone \_\_\_\_\_ Woreda \_\_\_\_\_

Select yes or no for the following practices and policies (Use observation when applicable)

|                                                                                                 | Y/N | Comment |
|-------------------------------------------------------------------------------------------------|-----|---------|
| <b>Policy related to RMC</b>                                                                    |     |         |
| Admission of family members/ person of choice to accompany women during labor/child birth       |     |         |
| A policy of allowing non harmful cultural rituals in the facility                               |     |         |
| Requirement of informed consent for procedures                                                  |     |         |
| Freedom of movement during labor (i.e., walking around)                                         |     |         |
| Allowing women choice of position for birth                                                     |     |         |
| Policy of keeping the newborn with the mother immediately after the birth                       |     |         |
| A policy of keeping mother and baby together throughout time in facility                        |     |         |
| A policy that prohibit detention of women in facility for lack of payment                       |     |         |
| Prevention of institutional violence against women and newborns                                 |     |         |
| <b>Infrastructure, materials, supplies</b>                                                      |     |         |
| Adequacy of infrastructure to ensure privacy during labor and birth (privacy screens, curtains) |     |         |
| Adequacy of infrastructure to ensure accommodation of companion during labor and birth          |     |         |
| Adequacy of infrastructure to ensure freedom of movement during labor                           |     |         |
| Acquiring necessary materials or supplies (curtains, screens to ensure privacy)                 |     |         |
| Availability of chairs for the birth companion; r and freedom to birth in vertical position     |     |         |
| <b>Community involvement</b>                                                                    |     |         |
| Feedback/anonymous reporting unprofessional behaviors                                           |     |         |
| Practice of facility tour (maternity open days) to pregnant women                               |     |         |
